# Supplementary material
Source: Springer Nature journal article supplement (https://www.springermedizin.de/resource/supplementary/12933_2009_174_MOESM4_ESM.pdf/9539756)

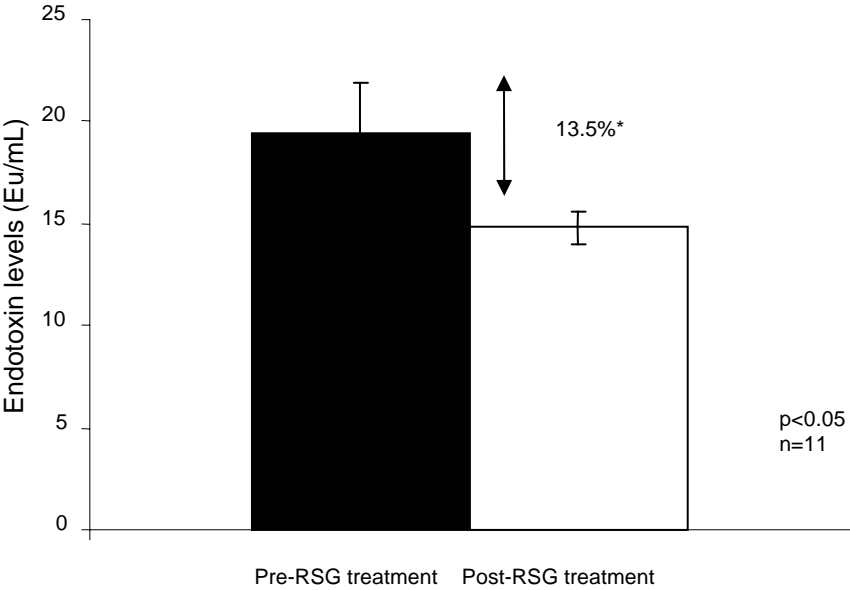

Supplement: MOESM4 [file 9539756]
